# Supplementary material for: Estimating time-dependent infectious contact: a multi-strain epidemiological model of SARS-CoV-2 on the island of Ireland
Source: bioRxiv or medRxiv preprint supplement (doi:10.1101/2022.03.25.22272942), 2022-05-09
Supplement: Supplementary file [file media-1.pdf]

## Supporting Information:

1

### S1: Key events and mandated non-pharmaceutical interventions

2

3

Table S1: Key events and mandated non-pharmaceutical interventions in the Republic of Ireland. The week column refers to the week since the first public health intervention started in either jurisdiction (i.e., 2020-03-12 in the Republic of Ireland)

| Date       | Intervention/Event                                                                     | Week | Source |
|------------|----------------------------------------------------------------------------------------|------|--------|
| 2020-02-27 | First confirmed COVID-19 case in Northern Ireland returning from Italy via Dublin.     | 0    | [1]    |
| 2020-02-29 | First confirmed COVID-19 case in Republic of Ireland.                                  | 0    | [2]    |
| 2020-03-05 | First confirmed community transmission of COVID-19.                                    | 0    | [3]    |
| 2020-03-12 | Close all schools, colleges, and childcare facilities.                                 | 1    | [2]    |
| 2020-03-16 | Close bars and public houses. Advise against house parties.                            | 1    | [4]    |
| 2020-03-28 | Stay at home order.                                                                    | 3    | [2]    |
| 2020-05-18 | Phase one easing of COVID-19 restrictions.                                             | 10   | [5]    |
| 2020-06-08 | Phase two-plus easing of COVID-19 restrictions. Stay local.                            | 13   | [5]    |
| 2020-06-29 | Phase three easing of COVID-19 restrictions.                                           | 16   | [5]    |
| 2020-07-07 | COVID tracker contact tracing app is released.                                         | 17   | [6]    |
| 2020-08-08 | Co. Kildare, Laois, and Offaly are put into a stricter lockdown.                       | 22   | [7]    |
| 2020-08-10 | Compulsory to wear a mask in shops and other enclosed public spaces.                   | 22   | [8]    |
| 2020-08-18 | Work from home where possible.                                                         | 23   | [9]    |
| 2020-08-21 | Co. Laois and Offaly specific restrictions lifted.                                     | 24   | [10]   |
| 2020-08-31 | Schools reopen.                                                                        | 25   | [11]   |
| 2020-09-16 | Five level framework introduced. National level 2 with some exceptions for Co. Dublin. | 27   | [12]   |
| 2020-09-19 | Co. Dublin move to level 3.                                                            | 28   | [13]   |
| 2020-09-26 | Co. Donegal move to level 3.                                                           | 29   | [14]   |
| 2020-10-07 | National Level 3 with enhanced enforcement. Indoor dining in pubs and restaurants ban. | 30   | [15]   |

|            |                                                                                                                                                                        |    |         |
|------------|------------------------------------------------------------------------------------------------------------------------------------------------------------------------|----|---------|
| 2020-10-16 | Co. Cavan, Donegal and Monaghan move to level 4. Nationwide ban on household visits except for essential reasons.                                                      | 32 | [16]    |
| 2020-10-22 | National level 5.                                                                                                                                                      | 33 | [17]    |
| 2020-11-02 | Alpha strain first detected.                                                                                                                                           | 34 | [18]    |
| 2020-12-01 | Reopen non-essential business. Households not to mix outside those within their bubble. No unnecessary inter-county travel. Face coverings mandatory in crowded areas. | 38 | [18]    |
| 2020-12-04 | Reopen restaurants, cafes, gastropubs, and hotel restaurants for indoor dining with restrictions.                                                                      | 39 | [19]    |
| 2020-12-18 | Households can mix with up to two other households. Travel outside of your county permitted.                                                                           | 41 | [19]    |
| 2020-12-22 | Schools close.                                                                                                                                                         | 41 | [20]    |
| 2020-12-24 | National level 5 lockdown with exceptions.                                                                                                                             | 42 | [21]    |
| 2020-12-27 | No new inter-county travel.                                                                                                                                            | 42 | [22]    |
| 2020-12-29 | First vaccine administered.                                                                                                                                            | 42 | [?]     |
| 2020-12-31 | Level 5 lockdown with no exceptions.                                                                                                                                   | 43 | [23]    |
| 2021-01-04 | First calendar week after holidays to return to work where possible.                                                                                                   | 43 | [24]    |
| 2021-01-09 | Construction closes except for social housing and projects near completion. Negative COVID test required for arrivals from UK.                                         | 44 | [25,26] |
| 2021-01-26 | Mandatory quarantine for all people arriving without a negative test.                                                                                                  | 46 | [27]    |

Table S2: Key events and mandated non-pharmaceutical interventions in Northern Ireland. The week column refers to the week since the first public health intervention started in either jurisdiction (i.e., 2020-03-12 in the Republic of Ireland)

| <b>Date</b> | <b>Intervention/Event</b>                                                                                                                                                                                                                                             | <b>Week</b> | <b>Source</b> |
|-------------|-----------------------------------------------------------------------------------------------------------------------------------------------------------------------------------------------------------------------------------------------------------------------|-------------|---------------|
| 2020-02-27  | First confirmed COVID-19 case in Northern Ireland returning from Italy via Dublin.                                                                                                                                                                                    | 0           | [1]           |
| 2020-03-20  | Close bars, gyms, restaurants and many other social venues.                                                                                                                                                                                                           | 2           | [28]          |
| 2020-03-28  | Lockdown and work from home.                                                                                                                                                                                                                                          | 3           | [29]          |
| 2020-04-24  | Opening of cemeteries on a restricted basis.                                                                                                                                                                                                                          | 7           | [29]          |
| 2020-05-18  | Allowance to travel to garden and recycling centres. Marriage ceremonies allowed for terminally ill.                                                                                                                                                                  | 10          | [29]          |
| 2020-05-19  | Allowance to travel to places of worship for individual prayer. Attend church services, live music or theatre performances. Certain outdoor activities such as tennis, golf and angling allowed. Meet in groups of up to six people outdoors.                         | 10          | [29]          |
| 2020-06-08  | People shielding able to spend time outside with people from their own household. Marriage/civil partnership ceremonies can take place outdoors (max 10 people). Reopen outdoor sports facilities and outdoor non-food retailers. Opening of non-food retail outlets. | 13          | [29]          |
| 2020-07-03  | Hotels, bars and restaurants reopen subject to restrictions. Reopen tourist attractions and museums.                                                                                                                                                                  | 17          | [29]          |
| 2020-07-06  | Reopen hairdressers, spas, massage and reflexology providers. Visits to hospitals and care homes allowed to continue.                                                                                                                                                 | 17          | [29]          |
| 2020-07-10  | Indoor gyms, bingo halls, amusement arcades, outdoor playgrounds and cinemas reopen.                                                                                                                                                                                  | 18          | [29]          |
| 2020-07-24  | Number of people allowed to gather in a residential setting increased from six to ten. Reopen community centres, swimming pools and funfairs. Spectators are able to attend outdoor competitive games.                                                                | 20          | [29]          |
| 2020-08-01  | Those shielding are now able to leave their homes.                                                                                                                                                                                                                    | 21          | [29]          |
| 2020-08-03  | Eat Out to Help Out scheme was implemented.                                                                                                                                                                                                                           | 21          | [29]          |
| 2020-08-10  | Compulsory to wear a mask in shops and other enclosed public spaces.                                                                                                                                                                                                  | 22          | [29]          |
| 2020-08-21  | People able to meet outdoors (max 15 people). Groups indoors limited to six people from two households.                                                                                                                                                               | 24          | [29]          |

|            |                                                                                                  |    |      |
|------------|--------------------------------------------------------------------------------------------------|----|------|
| 2020-09-14 | Local restrictions put in place in Belfast, Ballymena and parts of Glenavy, Lisburn and Crumlin. | 27 | [29] |
| 2020-09-22 | No longer able to visit others in their homes.                                                   | 28 | [29] |
| 2020-10-01 | Bars and restaurants close.                                                                      | 30 | [29] |
| 2020-10-16 | Circuit breaker lockdown introduced.                                                             | 32 | [30] |
| 2020-10-19 | Schools to close for 2 weeks.                                                                    | 32 | [29] |
| 2020-11-20 | Close contact services and unlicensed premises such as cafes able to open for 1 week.            | 37 | [29] |
| 2020-11-27 | Non-essential retail close for 2 weeks. Places of worship to close.                              | 38 | [29] |
| 2020-12-08 | First vaccine administered.                                                                      | 39 | [31] |
| 2020-12-11 | Reopen restaurants, gyms, non-essential retail and places of worship. Wet-pubs remain closed.    | 40 | [29] |
| 2020-12-23 | Alpha strain first detected.                                                                     | 41 | [32] |
| 2020-12-26 | Lockdown restrictions put back in place.                                                         | 42 | [29] |

## S2: Sensitivity to smoothing of the contact parameter, $c$

Our study tracks the infectious contact ratio,  $c$  per week, to investigate the change in human behaviour. Specifically, we estimated the log proportional change in the contact ratio from the previous week,  $\phi$  (Eq. 10 & 11) with a prior  $\sim \mathcal{N}(0, \epsilon)$ , where  $\epsilon$  is a hyper-parameter controlling the extent of smoothing: i.e., the lower the  $\epsilon$  hyper-parameter, the larger the influence of  $c$  from the previous week.

To examine the effect of smoothing on the estimation of infectious contact ratio  $c$ , we conducted a series of sensitivity analyses. First, we simulated data assuming three scenarios in which the contact ratio remains at 1.0 for two weeks following an introduction of SARS-CoV-2, and the ratio drops, on the third week, by 25, 50 and 75% respectively (green lines in Fig. S2). We then fitted the model (as described in Section 2.1.6 to the simulated data to assess whether the posterior distributions of  $c$  tracks the “true” change in the contact ratio,  $c$ . We found that 95% highest posterior density (HPD) overlaps with the “true” contact ratio at 25% and 50% reduction in weekly contact (Fig. S1). When the contact ratio declines by 75%, the estimated contact ratio was overestimated for one week following an abrupt change (Week 3 at 0.75 in Fig. S1). We conclude that our approach to smooth the weekly contact ratio is unlikely to substantially bias interpretation as changes in human mobility per week are typically within 25% and unlikely to exceed 75% (Fig. S2).

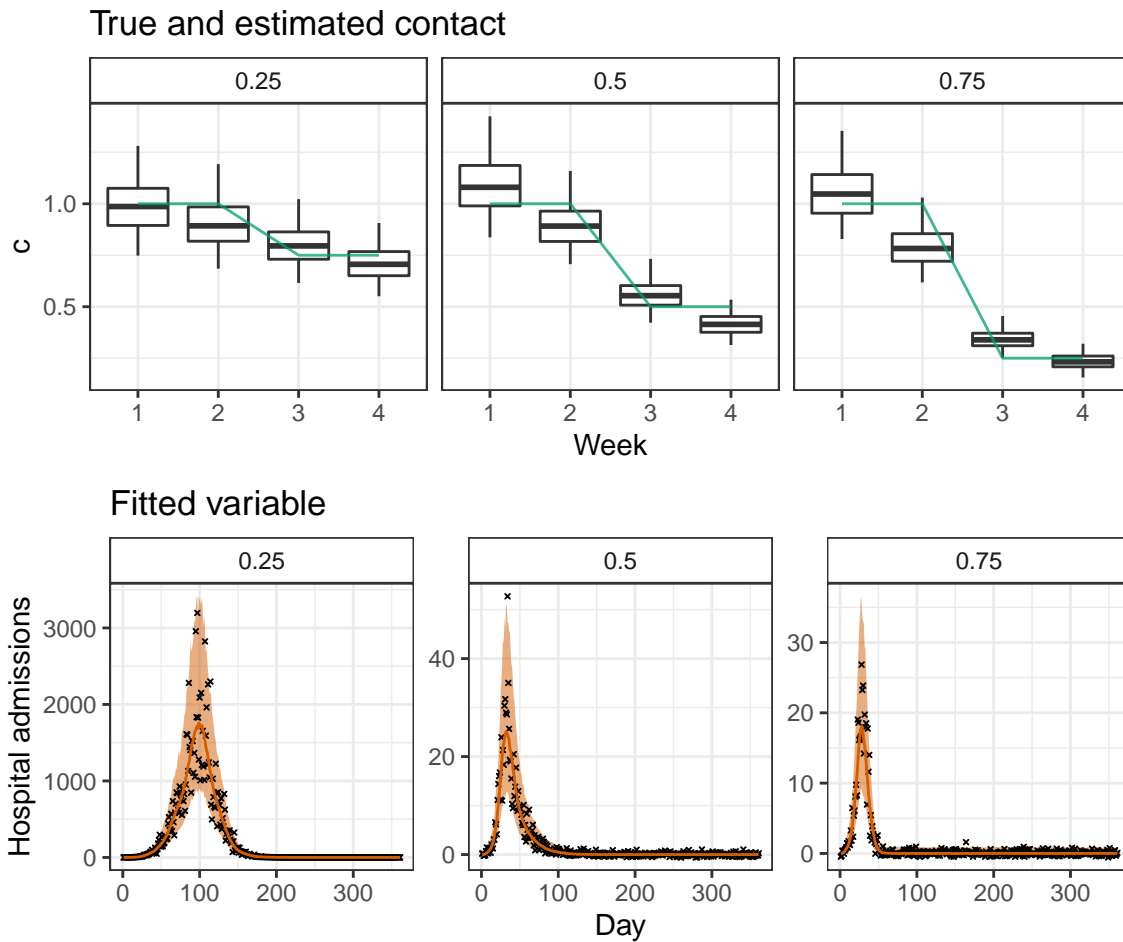

Figure S1: Smoothing of the contact parameter,  $c$  based on Eq.10 & 11 (main text) is unlikely to bias inference of the 95% predictive intervals, so far as the weekly change in contact remains below 75%. We simulated data assuming three scenarios in which the contact ratio remains at 1.0 for two weeks following an introduction of SARS-CoV-2 and the ratio drops by 25, 50 and 75% respectively. The top panels show the “true” contact ratio (green line) and the estimated contact ratios (box and whiskers) over two weeks before and after the change in the contact ratio (i.e., between Week 2 and 3). With each box, the thick horizontal line, box edges and whiskers correspond to the median, 50% and 95% density of posterior distributions, respectively. The bottom panels show the simulated data (black crosses), and the coloured bands correspond to 95% predictive intervals of the model fit, incorporating uncertainty in parameter estimation and sampling.

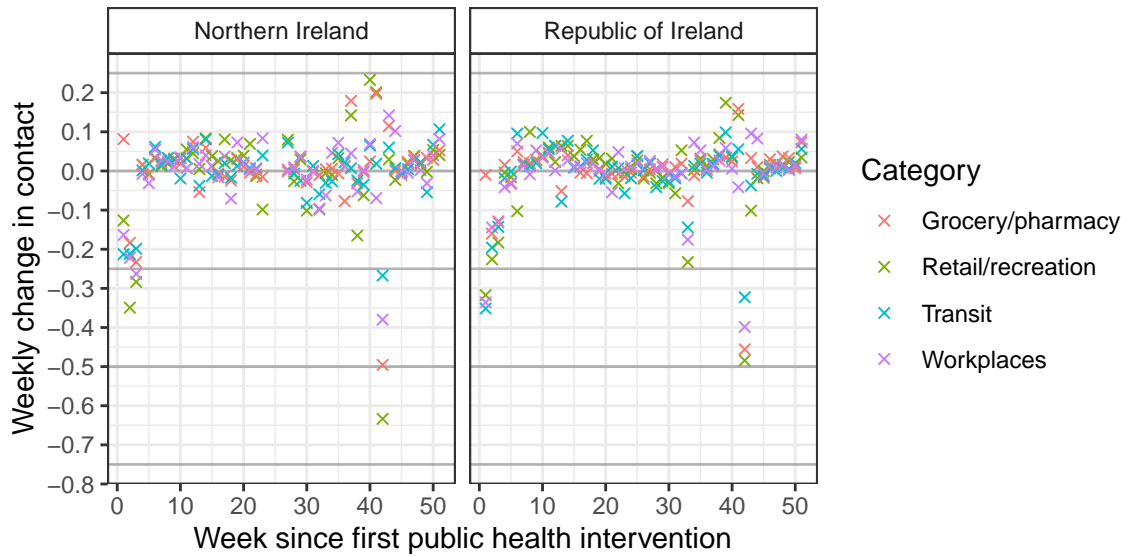

Figure S2: Google Mobility data indicate the weekly changes in contact are within 25% of the previous week in the majority of weeks. Shown are four categories of contact mostly likely related positively to SARS-CoV-2 transmission. The x-axis refers to the week since the first public health intervention was introduced on 2020-03-12 (Table 1 & 2).

### S3: Assessment of model fit: standardised residuals

23

To provide a rigorous assessment of the model fit, we examined the standardised residuals of the fitted model. By integrating over the posterior density of each parameter,  $\Phi$ , the marginal standardised residual of each data point  $i$  was defined as:

24

25

26

$$r_{x,i} = \frac{1}{\sigma_x} \int_{\Phi} (x_{data,i} - x_{model,i}(\Phi)) d\Phi$$

where  $\sigma_x$  is standard deviation of  $x$ , which is either the number of hospital admission or logit-transformed frequency of the Alpha strain.

27

28



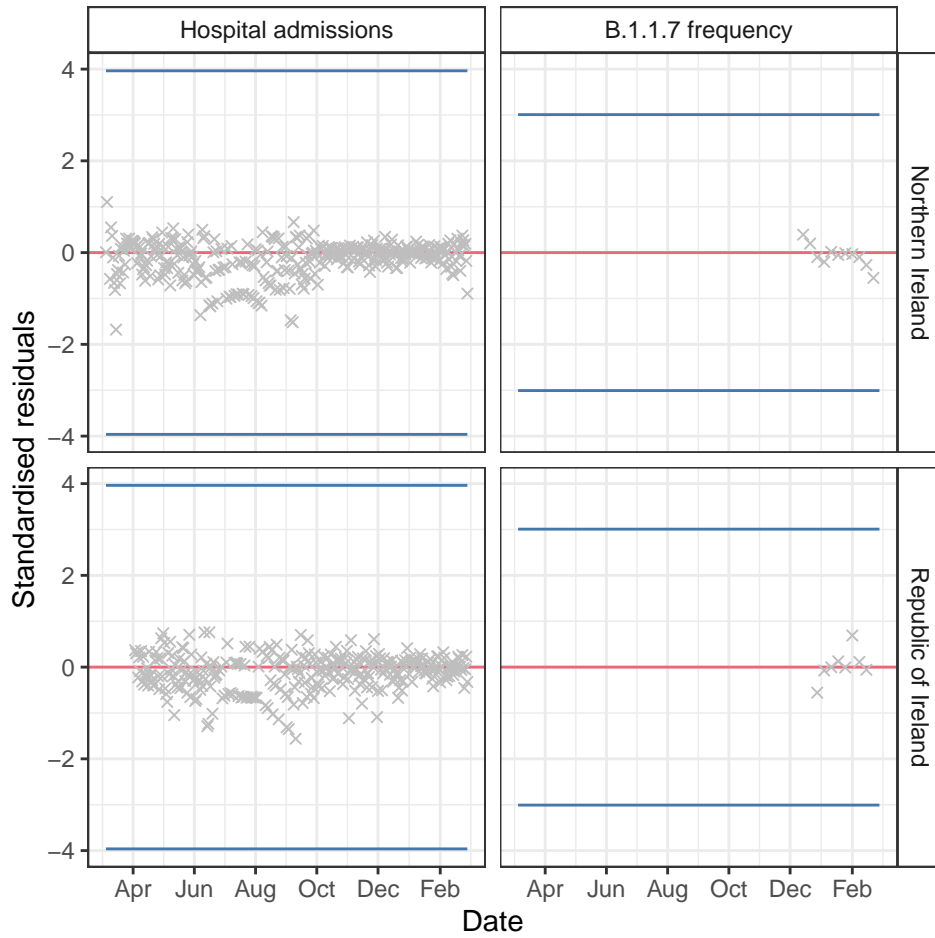

Figure S3: Standardised model residuals of models. Poor fits are indicated by the mean residuals deviating from confidence intervals (blue dotted lines indicated the Bonferroni-corrected 95% intervals).

## S4: Assessment of posterior accuracy, precision and prior contraction

We leveraged the properties of posterior distributions to identify potential model fitting problems that might manifest from our model assumptions. To examine the accuracy and precision of posterior distributions, we first generated simulated observations based on the estimated posterior mean parameters. We then refitted our model to the simulated observations (i.e., secondary fitting) to compute the posterior z-score for each parameter, which measures how closely the posterior recovers the parameters of the data generating process. [33]:

$$z = \frac{\mathbb{E}_{\text{sim}} - \mathbb{E}_{\text{post}}}{\sigma_{\text{sim}}},$$

where  $\mathbb{E}_{\text{post}}$  denotes the posterior mean of the fit to the actual data that we consider the ‘true’ parameter.  $\mathbb{E}_{\text{sim}}$  and  $\sigma_{\text{sim}}$  denote the mean and standard deviation of the posterior distribution of the secondary fitting. The smaller the z-score, the closer the bulk of the posterior is to the true parameter [33]. In contrast, large z-values may be indicative of overfitting and, or poor bad prior specifications [33].

To examine the influence of the likelihood function in relation to prior information, we computed the posterior contraction,  $k$ :

$$k = 1 - \frac{\sigma_{\text{post}}^2}{\sigma_{\text{prior}}^2}$$

where  $\sigma_{\text{post}}^2$  and  $\sigma_{\text{prior}}^2$  correspond to the variance of posterior and prior distributions, respectively. The  $k$  values close to zero indicate that data contain little information (i.e., rendering priors strongly informative). Conversely, values close to 1 indicate that data are much more informative than the prior [33].

We found that the most of our model parameters and hyperparameters — were estimated with accuracy and precision and identifiability, with the absolute posterior z-scores below three (Fig. S4). A small number of log proportional changes in contact,  $\phi$  showed a tendency towards overfitting (the absolute posterior z-scores above three). The larger absolute posterior z-scores all coincided with periods of relative stasis in the contract ratio and included the weeks indexed 34 in NI and 6, 8, 9 and 49 for ROI (Fig. 3, main text). Thus, caution might be warranted when interpreting the contact ratio for these weeks — nonetheless, a small number of z-scores exceeding the absolute number of three is unlikely to be a cause of concern [33]. We found that the posterior distributions for  $\phi$  contracted by over 50% compared to the prior distribution, i.e.,  $\sim \mathcal{N}(0, \epsilon)$ , for most weeks, meaning that the weekly changes in contact were moderately informed by the smoothing hyperprior  $\epsilon$ , which was itself well-identified from data (Fig. S4). The  $\phi$  parameters were poorly identified for the last two weeks of the studied period (weeks indexed 50 and 51 in both

justifications) as hospital admission data in the subsequent weeks required to inform these 62  
parameters were not included in model fitting. 63

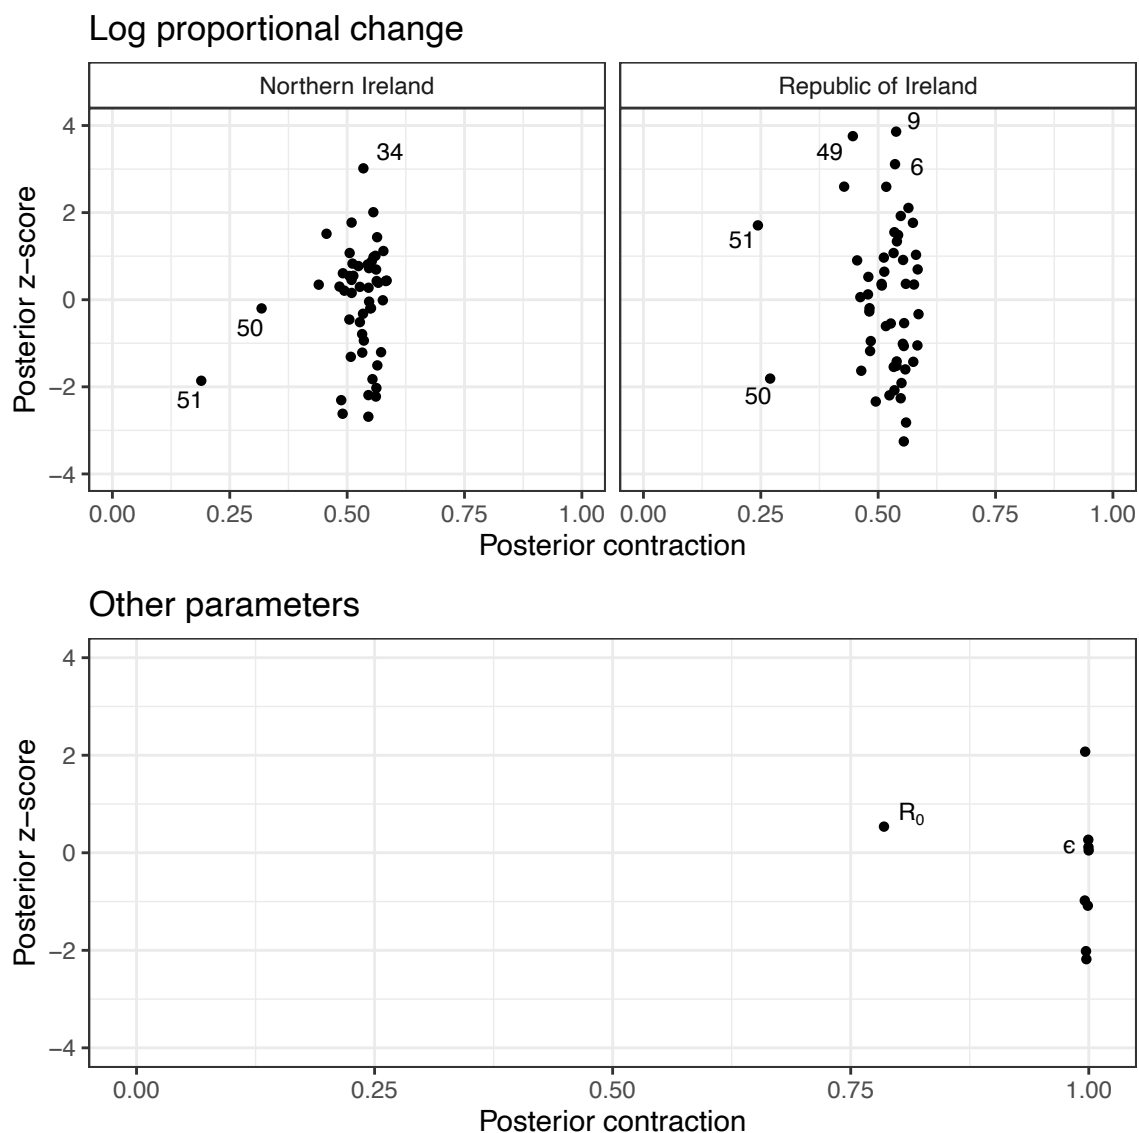

Figure S4: Accuracy, precision and identifiability of estimated parameters. Posterior z-score (y-axis) measures how closely the posterior recovers the parameters of the true data generating process and posterior contraction (x-axis) evaluates the influence of the likelihood function over the prior, respectively. Smaller absolute posterior z-scores indicate that the posterior accurately recovers the parameters of the data generating process: the absolute value beyond three to four may indicate substantial bias [33]. The posterior contraction values close to one indicate that data are much more informative than the prior. Other parameters refer to all estimated parameters excluding log-proportional changes (see Table 1 for the list of estimated parameters). The estimated parameter are represented by filled dots, which are labelled if mentioned in text.

## References

- [1] BBC News. Northern Ireland diagnoses first coronavirus case; 2020. Available from: <https://www.bbc.com/news/uk-51667483>. 64  
65  
66
- [2] Department of Health. Updates on COVID-19 from January – March 2020; 2020. Available from: <https://www.gov.ie/en/publication/ce3fe8-previous-updates-on-covid-19-coronavirus/>. 67  
68  
69
- [3] RTE. Seven new coronavirus cases confirmed in Republic of Ireland; 2020. Available from: <https://www.rte.ie/news/coronavirus/2020/0305/1120323-ireland-virus-containment/>. 70  
71  
72
- [4] Department of Health. Statement from the National Public Health Emergency Team – Sunday 15 March; 2020. Available from: <https://www.gov.ie/en/press-release/d4cf4a-statement-from-the-national-public-health-emergency-team-sunday-15-m/>. 73  
74  
75
- [5] Department of the Taoiseach. Government publishes roadmap to ease COVID-19 restrictions and reopen Ireland’s society and economy; 2020. Available from: <https://www.gov.ie/en/press-release/e5e599-government-publishes-roadmap-to-ease-covid-19-restrictions-and-reopen/>. 76  
77  
78  
79
- [6] RTE. How it works: Ireland’s new covid tracing app; 2020. Available from: <https://www.rte.ie/news/coronavirus/2020/0707/1151885-covid-app-explainer/>. 80  
81
- [7] The Journal. New Covid-19 restrictions for Kildare, Laois and Offaly to kick in from midnight; 2020. Available from: <https://www.thejournal.ie/new-covid-19-restrictions-for-kildare-laois-and-offaly-5170255-Aug2020/>. 82  
83  
84
- [8] The Irish Times. Face coverings now mandatory in shops and other indoor settings; 2020. Available from: <https://www.irishtimes.com/news/ireland/irish-news/face-coverings-now-mandatory-in-shops-and-other-indoor-settings-1.4326434>. 85  
86  
87  
88
- [9] RTE. At a glance: What’s new with Covid-19 restrictions; 2020. Available from: <https://www.rte.ie/news/coronavirus/2020/0818/1159878-virus-press-conference/>. 89  
90  
91
- [10] RTE. Kildare restrictions extended as cases remain high; 2020. Available from: <https://www.rte.ie/news/2020/0821/1160419-midlands-restrictions-lifted/>. 92  
93
- [11] Department of Education. Roadmap for the full return to school; 2020. Available from: <https://www.gov.ie/en/publication/b264b-roadmap-for-the-full-return-to-school/>. 94  
95  
96

- [12] RTE. What's in the government's medium-term plan for living with Covid?; 2020. Available from: <https://www.rte.ie/news/2020/0915/1165322-living-with-covid-summary/>. 97  
98  
99
- [13] RTE. Taoiseach says Dublin 'is in a dangerous place' and new restrictions 'will save lives'; 2020. Available from: <https://www.rte.ie/news/2020/0918/1166095-taoiseach-statement-covid/>. 100  
101  
102
- [14] Department of the Taoiseach. Donegal placed on Level 3 under Ireland's plan for living with COVID-19; 2020. Available from: <https://www.gov.ie/en/press-release/89d0a-donegal-placed-on-level-3-under-irelands-plan-for-living-with-covid-19/>. 103  
104  
105
- [15] Department of the Taoiseach. All remaining counties to join Donegal and Dublin on Level 3 under Ireland's plan for living with COVID-19; 2020. Available from: <https://www.gov.ie/en/press-release/f3d24-all-remaining-counties-to-join-donegal-and-dublin-on-level-3-under-irelands-plan-for-living-with-covid-19/>. 106  
107  
108  
109
- [16] Department of the Taoiseach. Cavan, Donegal and Monaghan placed on Level 4 under Ireland's plan for living with Covid-19; 2020. Available from: <https://www.gov.ie/en/press-release/c3cc85-cavan-donegal-and-monaghan-placed-on-level-4-under-irelands-plan-for-living-with-covid-19/>. 110  
111  
112  
113
- [17] RTE. Country moving to Level 5 restrictions for six weeks; 2020. Available from: <https://www.rte.ie/news/coronavirus/2020/1019/1172397-coronavirus-ireland/>. 114  
115  
116
- [18] Department of Health. NPHET COVID Update 21st January 2021; 2021. Available from: <https://assets.gov.ie/121054/55e77ccd-7d71-4553-90c9-5cd6cdee7420.pdf>. 117  
118  
119
- [19] Department of the Taoiseach. Ireland placed on Level 3 of the plan for living with Covid-19; 2020. Available from: <https://www.gov.ie/en/press-release/5b068-ireland-placed-on-level-3-of-the-plan-for-living-with-covid-with-special-measures/>. 120  
121  
122
- [20] Citizens Information. School terms in primary and post-primary schools; 2021. Available from: [https://www.citizensinformation.ie/en/education/primary\\_and\\_post\\_primary\\_education/attendance\\_and\\_discipline\\_in\\_schools/school\\_terms\\_in\\_primary\\_and\\_postprimary.html](https://www.citizensinformation.ie/en/education/primary_and_post_primary_education/attendance_and_discipline_in_schools/school_terms_in_primary_and_postprimary.html). 123  
124  
125  
126
- [21] Department of the Taoiseach. Ireland placed on Level 5 restrictions of the plan for living with COVID-19 – with a number of specific adjustments; 2020. Available from: <https://www.gov.ie/en/press-release/a1f21-ireland-placed-on-level-5-restrictions-of-the-plan-for-living-with-covid-19-with-specific-adjustments/>. 127  
128  
129  
130

- [22] The Irish Times. Covid-19: Ban on inter-county travel now in effect; 2020. Available from: <https://www.irishtimes.com/news/health/covid-19-ban-on-inter-county-travel-now-in-effect-1.4445945>. 131  
132  
133
- [23] The Irish Times. Level 5 restrictions to remain in place until January 31st, says Taoiseach; 2020. Available from: <https://www.irishtimes.com/news/health/level-5-restrictions-to-remain-in-place-until-january-31st-says-taoiseach-1.4447414>. 134  
135  
136  
137
- [24] Citizens Information. Public holidays; 2021. Available from: [https://www.citizensinformation.ie/en/employment/employment\\_rights\\_and\\_conditions/leave\\_and\\_holidays/public\\_holidays\\_in\\_ireland.html](https://www.citizensinformation.ie/en/employment/employment_rights_and_conditions/leave_and_holidays/public_holidays_in_ireland.html). 138  
139  
140
- [25] RTE. Non-essential construction to cease at 6pm on Friday; 2021. Available from: <https://www.rte.ie/news/coronavirus/2021/0106/1188095-coronavirus-construction-sector/>. 141  
142  
143
- [26] The Journal. All travellers into Ireland will need negative PCR test from previous 72 hours; 2021. Available from: <https://www.thejournal.ie/uk-government-travel-restrictions-january-5316212-Jan2021/>. 144  
145  
146
- [27] Department of Foreign Affairs. General COVID-19 travel advisory in operation; 2021. Available from: <https://www.dfa.ie/travel/travel-advice/coronavirus/general-covid-19-travel-advisory/>. 147  
148  
149
- [28] BBC News. UK pubs and restaurants told to shut in virus fight; 2020. Available from: <https://www.bbc.com/news/uk-51981653>. 150  
151
- [29] Department of Health Northern Ireland. COVID-19 mobility report;. Available from: <https://www.health-ni.gov.uk/sites/default/files/publications/health/covid-19-mobility-reports-12-03-21.pdf>. 152  
153  
154
- [30] Executive Office Northern Ireland. Executive tightens restrictions to curb Covid-19; 2020. Available from: <https://www.executiveoffice-ni.gov.uk/news/executive-tightens-restrictions-curb-covid-19>. 155  
156  
157
- [31] BBC News. Coronavirus vaccine: First care home residents in NI receive Covid jab; 2020. Available from: <https://www.bbc.com/news/uk-northern-ireland-55216347>. 158  
159  
160
- [32] The Irish Times. First case of UK variant strain of Covid-19 confirmed in Northern Ireland; 2020. Available from: <https://www.irishtimes.com/news/ireland/irish-news/first-case-of-uk-variant-strain-of-covid-19-confirmed-in-northern-ireland-1.4444730>. 161  
162  
163  
164  
165

[33] Betancourt M. Towards a principled Bayesian workflow; 2020.

166
